# Supplementary material for: Identification of the novel Np17 oncogene in human leukemia
Source: publisher site journal article supplement (doi:10.18632/aging.103808), 2020-11-21
Supplement: Supplementary file [file aging-v12i23-103808-supplementary-material-SD1.pdf]

**SUPPLEMENTARY FIGURES**

ACGGGGAGGGGTTTGGAGGGGGATGGGAATGTGGCTCAAGTTCGGGAGGGCTTACCTGCGGAGGGTTTGGAGCAGGCCAGGAGCGGAGC  
 CCATGGTCTCCGCCGCGGGCCAGGGGCGGGCCCCAGGATCCGGAGCTTCGTGCGGGCCGAGTCCAGGTTTGGGGCCCGGAGGCGGGG  
 CCAGTTAGGGCGAGGGTCCCTGGGATCGTCGGGTCAGGCCCTTGGGCTAACGTAGGCACTCTCGCAGTTCCTCCGCCTTCAGGAAGGTCTTTT  
 CAGCAGGGGCTTACGGGTGCATGCTTCGGTCTGGAGGCCCTTATCCTAGCCTCCTCCATCAGCGCCACCCGCTTGGGGCCGAAAGGAG  
 GGAGCTTTCCCTCTGTCCCCAGCCTTTGGACTGTCAGCAAACAAGCCATTGTTTCATCAAATACTTTTAAAGCGCCTACCATGTGCCTGACA  
 AGGGAGATGTAACGGTGAGAAAACTAGGTGTGGTCCAGGCCCTTCAGGGGCTCAGGTGCTGTGGAAGAAGTGGACATTGAAGTACTTAT  
 CACACAAATGAGGATAAAAGTACGATAGCGATATCTACCACGAAGCTGTTGTTCCCCACCAGAACCAATGAGCGCAAGATCTGACAAAAGA  
 AAAAAAAGGTTTCATCTTTTATTCTCCAAACACTTTCATTTAAATCAAGAGGATGGGATGTGGTTATTGCTGTGTTTTAGACAGAATCAAC  
 GGTTCCTGGGTCTGAGATGTTGCATACACCTTCTCAGTCCCTGTATCCTGAGATGGAGTACCTGAGAATCCACAGCAAGTCTAACCAGGG  
 ATGGGTCTGGGTGATTAAGGAAGGTTGCTTCAGAACTGGGCCAGGGGCACTGCTTTGCTTTTGTGATCAGTCTCTGCCTGAAGG  
 AGACAAGAAAAACCAACGGGAACAGCTGGGAAACTGAGTTACAGAGCTTGTCTGCACTGAGTATCAGGAGCAAAATGCTAGATCAGATA  
 GGGTCTCTCTCTGCCACCCAGGCCAGAGTGCAGTTGACGAGGCCAGGGCAGCCGAAAGTGGAGCATAGTGTGTCGGAACTGGTGGG  
 TTCTTGGTCTACTGACTTCAAGAAAGAAGCCGCGGACCCTCGCGGTGAGTGTACAGTTCTTAAAGGTGCGTGTCCAGAGTTTGTTCCTTC  
 TGATGCTCGGATGTGTTGAGAGTTTCTTCTTCTGGTGGTTTTGTGGTCTCGCTGGCTCAGGAGTGAAGCTGCAGACCTCAAGAAATGAGG  
 CTCTCCCCAGGACCAGCATTCCACGAAGGCAGCCCTTTCTAGATGGAGAAAACAGAACTGAAGACACCCGTTTCCCTAAAATGCTCTCG  
 CTCATGTAACCTCTGGAGGGCAGAGGCATGCCATCTCATCTTGCATTACCACCACCAACACTATCGGGGGACCTGCCCTGATAA  
 TCAGTACAGGTGTATCCAGCAGCTCCAGAGAGACGACGACCAGCGAGAAGGGGCCATGATGATGGAGGTGGTTTTGTCAAACGAAAT  
 GGGGATATGTAGGAAAAGAAAGAGAGATCAGACTGTTACTGTGTCTACATAGAAAAGGAAGACATAAGAGACTCCATTTTGA AAAAGAC  
 CTGTACTTTAAACAATTGCTTTGCTGAGATGTTGTTAATCTGTAGCTTTGCCCCAGCCACTTTGCCCAACCACTTTGACCCAATCTGGAGCT  
 CATAAAAACATGTGTTGATGAAATCAAGGTTAAGGCATGAGGGCTGTGCAGGACGTGCCTTGTAAACCAATGTTTGAAGCAGTATAC  
 TTGGTAAAAGTTCATCACCATTCTCTCGTCTCAATAAACAGGGGCAACAATGCATGTGGAAAGCCGACAGGGACCTCTGCCCTTGAAGCTGG  
 GTATTGTCCAAAGTTTCTCCCATGTGATAGTCTGAAATATGGCCTCGTGGGATGAGAAAGACCTGACGGTCCCCAGCGGACACCCATAA  
 AAGATCTGTGCTGAGGTGATTAGTCAAAGAGGAAAGACTTGCAGTTGAGATAGAGGAAGGCCACTGTCTCTGACTGCCCTGGGAACTG  
 AATGTCTCGGTATAAAACACGATTGTACATTTGTTCAAGTCTGAGATGGGAGAAATACCGCCCTATGGTGGGAGGGCAGACATGTTTACAGC  
 AATGCTGCCTTGTATCTTTACTCCACTGAGATGCTGGGTGGAGAGAAAACATAAAATCTGGCTTACGTGCACGCTCCAGTCATAGTACCTTC  
 CTTGAATTCATTATGTCATAGATTCTATTGCTCACGTTTGTGCTGACCTTCTCCTTATTATCACCTGCCCTCTACTACATTCCTTTTTGT  
 GAAATAATGAAGATAATAATAAAAACACTGAGGGAATTCAGAGACCTGTGCCAGTGCAGGTCTTAGCATGCTAAGCGCAGGTCCCTG  
 GGCCCGCTGTTGTTTTTTTT

**Supplementary Figure 1. Sequences of Np17 mRNA and open reading frame (ORF).** Np17mRNA: gi|34526700|dbj|AK129982.1|, Homo sapiens cDNA FLJ26472 fis, clone KDN04506 (2501bp). ORF sequence is highlighted by blue color.

|          |                 |     |                                                               |     |
|----------|-----------------|-----|---------------------------------------------------------------|-----|
| <b>A</b> | Human Np17      | 1   | MRLLPRTSIPRRQPF SRWRKQNLKTPVSLNCSRSCKLLEGRGMPAIFIIALPPPNTIGGP | 60  |
|          | Chimpanzee Np17 | 1   | MRLLPRTSIPRRQPF SRWRKQNLKTPVSLNCSRSCKLLEGRG PAIFIIALPPPNTIGGP | 60  |
|          | Human Np17      | 61  | ALIISLQVYPAAPERQRPARRGHDDGGGFVKTKMGICREKKERSDCYCVYIEREDIRDSI  | 120 |
|          | Chimpanzee Np17 | 61  | ALIISLQVY SAAPERQRPARRGHDDGGGFVKTKMGICREKKERSDCYCVYIEREDIRDSI | 120 |
|          | Human Np17      | 121 | LKKTCTLNNCF AEMLLICSFAPATLPQPL                                | 149 |
|          | Chimpanzee Np17 | 121 | LKTCTLKNCF AEMLLICSFAPATLPQPL                                 | 149 |
| <b>B</b> | Human Np17      | 1   | MRLLPRTSIPRRQPF SRWRKQNLKTPVSLNCSRSCKLLEGRGMPAIFIIALPPPNTIGGP | 60  |
|          | Gorilla Np17    | 1   | MRLLPRTSIPRRQPF SR RQNLKTPVSLNCSRSCKLLEGRGMPAIFIIALPPPNTIGGP  | 35  |
|          | Human Np17      | 61  | ALIISLQVYPAAPERQRPARRGHDDGGGFVKTKMGICREKKERSDCYCVYIEREDIRDSI  | 120 |
|          | Gorilla Np17    | 36  | -----LQVYPAAPERQRPARRGHNDGAGFVKKKRGICREKKE--DCYCVYIEKEDIRDSI  | 88  |
|          | Human Np17      | 121 | LKKTCTLNNCF AEMLLICSFAPATLPQPL                                | 149 |
|          | Gorilla Np17    | 89  | LKKACTLNNF AEMLLICSFAPATLPQPL                                 | 117 |

**Supplementary Figure 2. Amino acid sequence alignments of Np17.** (A, B) Amino acid sequence alignments of human Np17 with Chimpanzee (A) and Gorilla (B) Np17.

```

*      20      *      40      *      60      *      80      *      100     *      120     *      140
NB4-1 : MRLLPRTSIPRRQPPSRWRKQNLKTPVSLNCSRSCKLLEGRGMPAIFIALPPPTIGGPALIIISLQVYPAAPERQRPARRGHDDGGGFVTKMGICREKKERSDCYCVYIEREDIRDSILKKTCTLNCF AEMLLICSFAPATLPQPL : 149
NB4-2 : ..... : 149
NB4-3 : ..... : 149
NB4-4 : ..... : 149
KCL-22M1 : ..... : 149
KCL-22M2 : ..... : 149
K562-1 : ..... : 149
K562-2 : ..... S ..... R ..... : 149
K562-3 : ..... S ..... R ..... : 149
K562-4 : ..... S ..... R ..... : 149
K562-5 : ..... R ..... : 149
Jurkat1 : ..... : 149
Jurkat2 : ..... D ..... : 149
Jurkat3 : ..... F ..... : 149
Jurkat4 : ..... : 149
Raji1 : ..... A ..... : 149
Raji2 : ..... : 149
U937-1 : ..... : 149
U937-2 : ..... G ..... : 149
U937-3 : ..... : 149
U937-4 : ..... G ..... : 149
NFB-W1 : ..... E ..... : 149
NFB-W2 : ..... : 149
NFB-W3 : ..... S ..... : 149
NFB-G1 : ..... : 149
NFB-G2 : ..... : 149
NFB-G3 : ..... E ..... : 149
NFB-G4 : ..... A ..... : 149
NFB-G5 : ..... : 149
NFB-X1 : ..... E ..... : 149
NFB-X2 : ..... : 149
NFB-X3 : ..... : 149
NFB-X4 : ..... : 149
NFB-H1 : ..... : 149
NFB-H2 : ..... R ..... : 149
NFB-H3 : ..... : 149
NFB-H4 : ..... : 149
NFB-H5 : ..... : 149
NFB-Z1 : ..... : 149
NFB-Z2 : ..... G ..... : 149
NFB-Z3 : ..... : 149
NFB-Z4 : ..... : 149

```

**Supplementary Figure 3. AA alignment of Np17 proteins of 42 cDNA clones from various leukemia cell lines and normal individuals.**

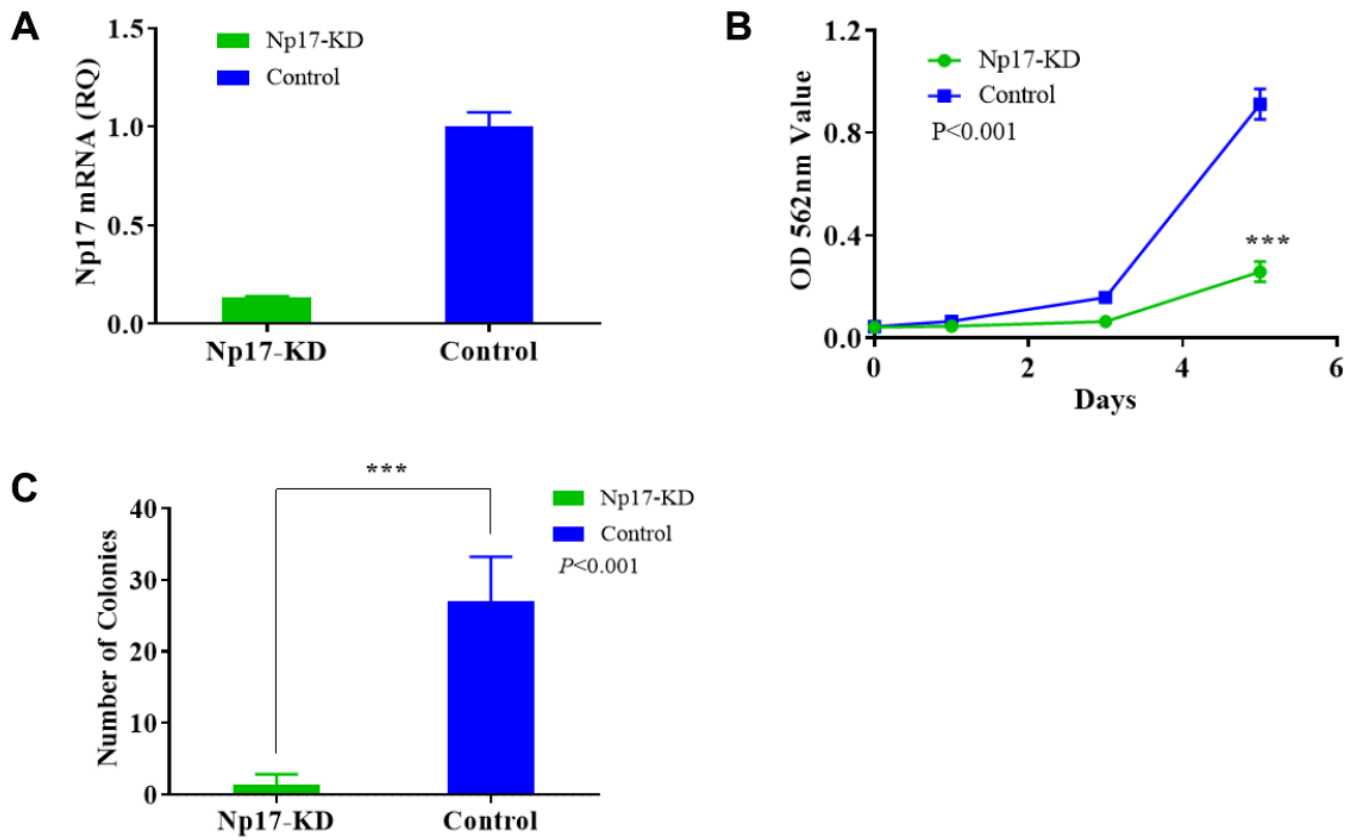

**Supplementary Figure 4. Knock-down of Np17 inhibits growth of leukemia cells.** (A) qRT-PCR showed that shRNA reduced np17 mRNA levels. (B) Np17-KD inhibited the growth of NB4 cells. (C) Np17-KD decreased colony numbers of NB4 cells.

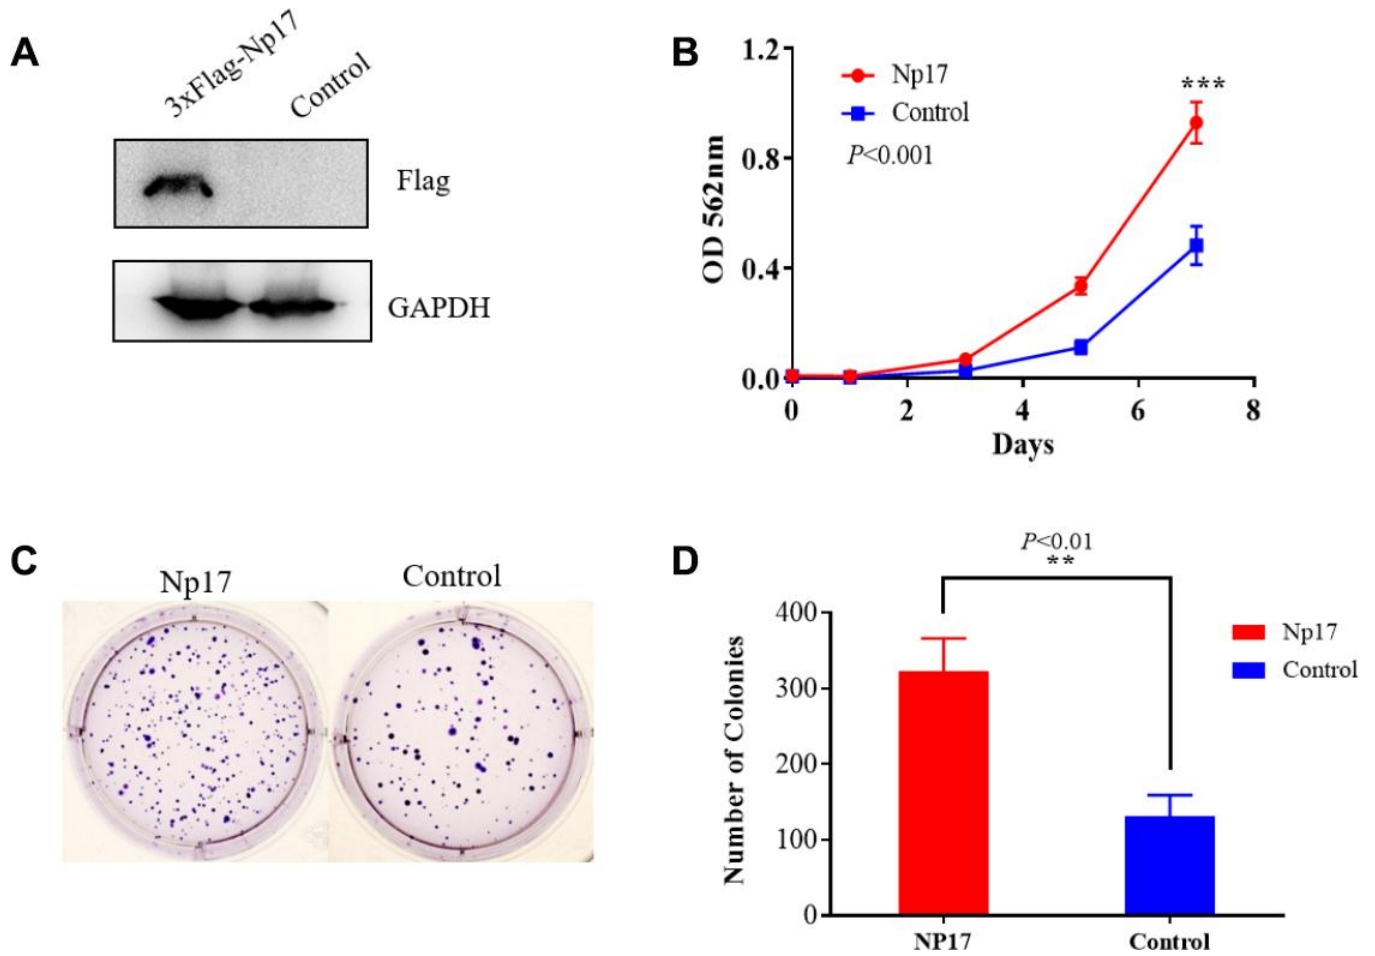

**Supplementary Figure 5. Overexpression of Np17 promotes the growth of AML cells.** (A) Western blotting analysis of Np17 levels in MOLM-13 cells after Np17 overexpression (Np17-OE). (B) Comparison of proliferation curves of Np17 overexpression with control in MOLM-13 cells. (C, D) Representative images and quantification of colony numbers of Np17-OE compared with control in MOLM-13 cells.

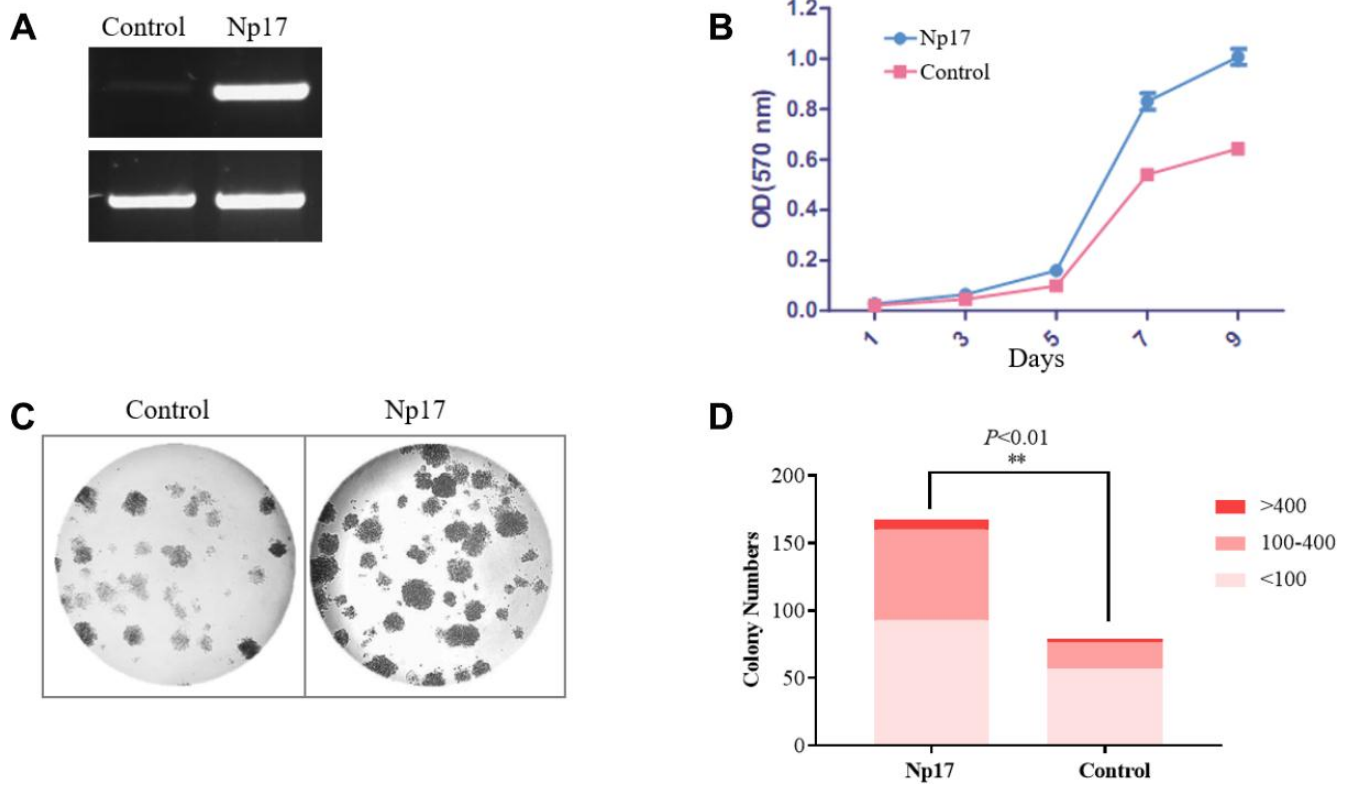

**Supplementary Figure 6. Overexpression of Np17 promotes proliferation and colony forming potential of tumor cells of CML blast crisis.** (A) PCR analysis of Np17 levels in K562 cells. (B) Comparison of proliferation curves between Np17- overexpressing K562 cells and control cells. (C, D) Representative images and quantification of colony numbers in K562 cells Np17-OE compared with control.

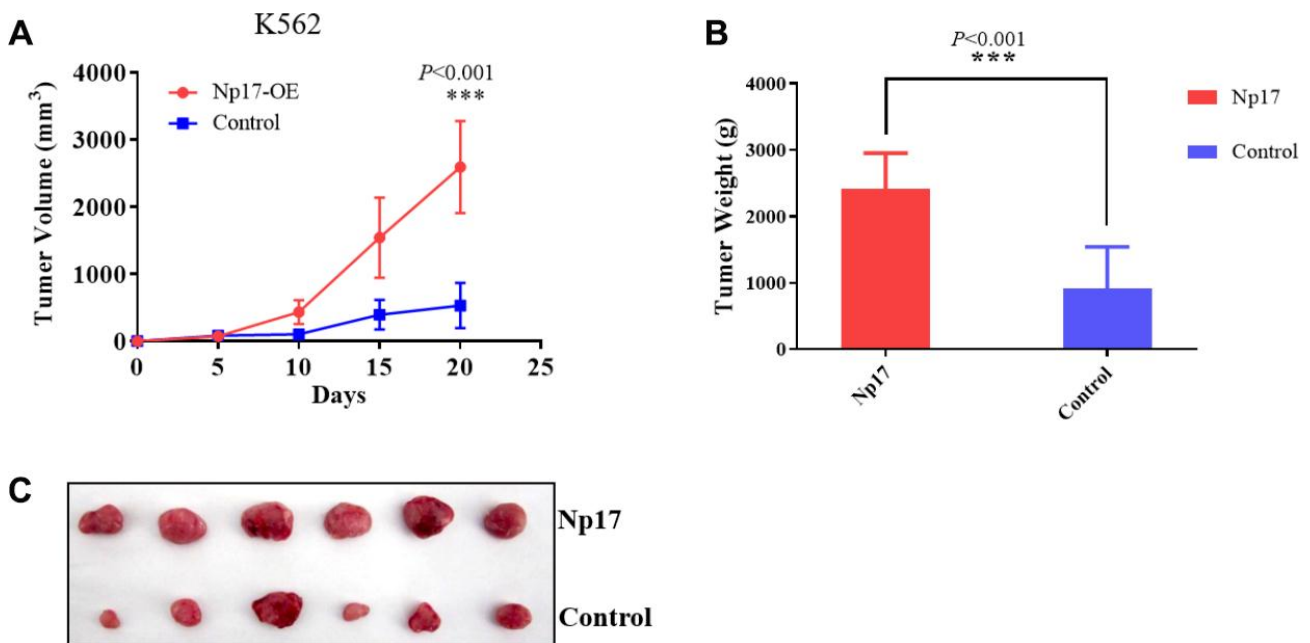

**Supplementary Figure 7. Overexpression of Np17 promotes the growth of leukemia cells in nude mice.** (A) Tumor volume comparison between Np17-OE and control (n=6). (B) Tumor weight comparison between Np17- OE and control at the end of experiments (n=6). (C) Representatives images of xenografts of Np17-OE and controls.
